# Supplementary material for: Langevin dynamics simulations for the critical adsorption of end-grafted active polymers
Source: Royal Society of Chemistry journal article supplement (doi:10.1039/d4sm00526k), 2024-01-01
Supplement: d4sm00526k1.pdf [file d4sm00526k1.pdf]

## Supporting Information

# Langevin dynamics simulations for the critical adsorption of end-grafted active polymers

Meng-Bo Luo\*, Yi-Fan Shen

*School of Physics, Zhejiang University, Hangzhou 310027, China*

*E-mail: luomengbo@zju.edu.cn*

## 1. Supplementary Plots

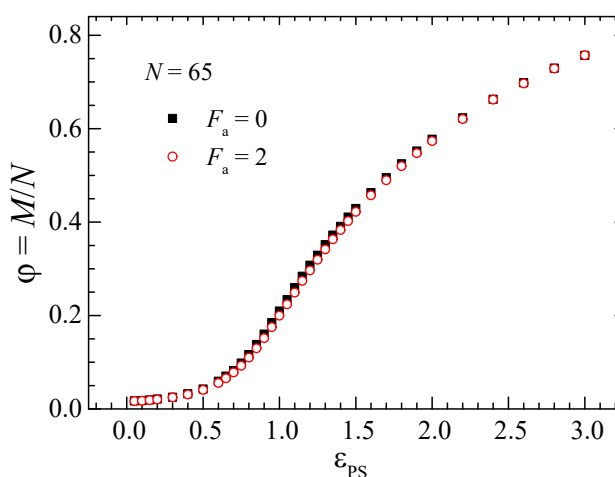

Figure S1. Plots of the fraction of adsorbed monomers  $\phi$  versus the surface attraction strength  $\epsilon_{PS}$  for a purely passive polymer ( $F_a = 0$ ) and for the RRAP chain at  $F_a = 2$ . Polymer length  $N = 65$ .

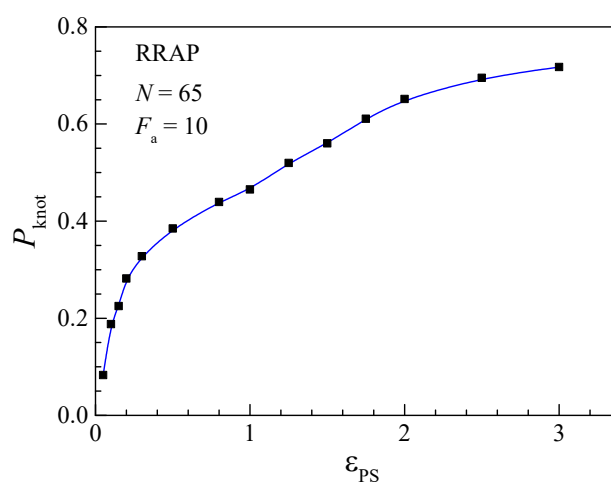

Figure S2. Plots of the probability of knotted conformations,  $P_{\text{knot}}$ , versus the surface

attraction strength  $\epsilon_{PS}$  at  $F_a = 10$  for the RRAP chain. Polymer length  $N = 65$ .

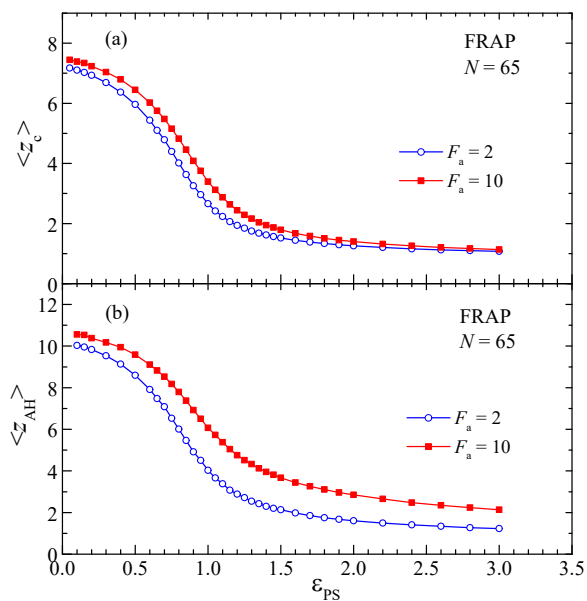

Figure S3. Plot of the mean height of the mass center of chain  $\langle z_c \rangle$  (a) and the mean height of the active head  $\langle z_{AH} \rangle$  (b) versus the surface attraction strength  $\epsilon_{PS}$  for the FRAP chain with  $F_a = 2$  and 10.

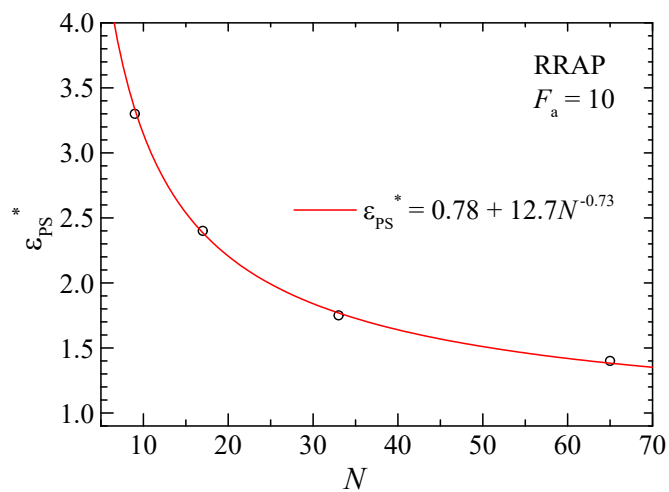

Figure S4. Plot of the critical attraction strength  $\epsilon_{PS}^*$  versus polymer length for the RRAP chain at the active force  $F_a = 10$ . The fitting function (solid line) is presented in the plot.

## 2. Original simulation data

### 2.1 Figure 2

| $F_a = 2$       |           | $F_a = 10$      |           |
|-----------------|-----------|-----------------|-----------|
| $\epsilon_{PS}$ | $\varphi$ | $\epsilon_{PS}$ | $\varphi$ |
| 0.05            | 0.016827  | 0.05            | 0.013743  |
| 0.1             | 0.017349  | 0.1             | 0.014742  |
| 0.15            | 0.018566  | 0.15            | 0.016205  |
| 0.2             | 0.020267  | 0.2             | 0.018089  |
| 0.3             | 0.024666  | 0.3             | 0.022392  |
| 0.4             | 0.030960  | 0.4             | 0.028169  |
| 0.5             | 0.040818  | 0.5             | 0.035937  |
| 0.6             | 0.055527  | 0.6             | 0.045209  |
| 0.65            | 0.065582  | 0.7             | 0.058596  |
| 0.7             | 0.078228  | 0.8             | 0.073547  |
| 0.75            | 0.092347  | 0.9             | 0.091287  |
| 0.8             | 0.109841  | 1               | 0.112402  |
| 0.85            | 0.129731  | 1.1             | 0.135957  |
| 0.9             | 0.151458  | 1.2             | 0.161146  |
| 0.95            | 0.175172  | 1.25            | 0.174940  |
| 1               | 0.199576  | 1.3             | 0.187671  |
| 1.05            | 0.223946  | 1.35            | 0.201254  |
| 1.1             | 0.248993  | 1.4             | 0.214387  |
| 1.15            | 0.274164  | 1.45            | 0.227458  |
| 1.2             | 0.296485  | 1.5             | 0.240422  |
| 1.25            | 0.319442  | 1.55            | 0.254113  |
| 1.3             | 0.341602  | 1.6             | 0.265821  |
| 1.35            | 0.363250  | 1.65            | 0.277397  |
| 1.4             | 0.383200  | 1.7             | 0.290178  |
| 1.45            | 0.402357  | 1.75            | 0.301544  |
| 1.5             | 0.422000  | 1.8             | 0.313468  |
| 1.6             | 0.457319  | 1.85            | 0.324719  |
| 1.7             | 0.489664  | 1.9             | 0.334116  |
| 1.8             | 0.519897  | 1.95            | 0.344734  |
| 1.9             | 0.547681  | 2               | 0.354758  |
| 2               | 0.573334  | 2.1             | 0.374130  |
| 2.2             | 0.620658  | 2.2             | 0.393701  |
| 2.4             | 0.662192  | 2.3             | 0.410950  |
| 2.6             | 0.696843  | 2.4             | 0.428787  |
| 2.8             | 0.728832  | 2.5             | 0.444496  |
| 3               | 0.757080  | 2.6             | 0.458328  |
|                 |           | 2.8             | 0.487365  |
|                 |           | 3               | 0.514487  |

|  |  |     |          |
|--|--|-----|----------|
|  |  | 3.2 | 0.537743 |
|  |  | 3.5 | 0.571526 |

2.2 Figure 3

| $F_a = 2$       |          |          | $F_a = 10$      |          |          |
|-----------------|----------|----------|-----------------|----------|----------|
| $\epsilon_{PS}$ | $z_c$    | $z_{AH}$ | $\epsilon_{PS}$ | $z_c$    | $z_{AH}$ |
| 0.05            | 7.288899 | 10.38655 | 0.05            | 9.862102 | 15.76225 |
| 0.1             | 7.280643 | 10.39378 | 0.1             | 9.555289 | 15.45045 |
| 0.15            | 7.187031 | 10.2963  | 0.15            | 9.288182 | 15.17549 |
| 0.2             | 7.091079 | 10.18016 | 0.2             | 9.026822 | 14.89146 |
| 0.3             | 6.870788 | 9.956771 | 0.3             | 8.734113 | 14.58075 |
| 0.4             | 6.560311 | 9.545372 | 0.4             | 8.439739 | 14.30046 |
| 0.5             | 6.18401  | 9.11836  | 0.5             | 8.148983 | 14.0254  |
| 0.6             | 5.662987 | 8.468727 | 0.6             | 7.855844 | 13.74791 |
| 0.65            | 5.367629 | 8.110569 | 0.7             | 7.482003 | 13.3648  |
| 0.7             | 5.013044 | 7.678966 | 0.8             | 7.152283 | 13.06353 |
| 0.75            | 4.667694 | 7.226649 | 0.9             | 6.788079 | 12.73831 |
| 0.8             | 4.274289 | 6.742889 | 1               | 6.392645 | 12.3263  |
| 0.85            | 3.89196  | 6.223869 | 1.1             | 5.99374  | 11.91371 |
| 0.9             | 3.519174 | 5.742502 | 1.2             | 5.557679 | 11.41821 |
| 0.95            | 3.160882 | 5.218263 | 1.25            | 5.327621 | 11.14254 |
| 1               | 2.862689 | 4.799648 | 1.3             | 5.117769 | 10.89644 |
| 1.05            | 2.61593  | 4.433515 | 1.35            | 4.906686 | 10.63221 |
| 1.1             | 2.391109 | 4.087194 | 1.4             | 4.710092 | 10.35238 |
| 1.15            | 2.20179  | 3.768725 | 1.45            | 4.526391 | 10.12916 |
| 1.2             | 2.063868 | 3.548524 | 1.5             | 4.348683 | 9.872656 |
| 1.25            | 1.939939 | 3.329345 | 1.55            | 4.146761 | 9.58579  |
| 1.3             | 1.83842  | 3.12561  | 1.6             | 3.997393 | 9.380523 |
| 1.35            | 1.751091 | 2.95027  | 1.65            | 3.845666 | 9.150668 |
| 1.4             | 1.680072 | 2.818574 | 1.7             | 3.694236 | 8.916982 |
| 1.45            | 1.620757 | 2.693533 | 1.75            | 3.565477 | 8.71585  |
| 1.5             | 1.567218 | 2.585875 | 1.8             | 3.439334 | 8.509382 |
| 1.6             | 1.478408 | 2.37616  | 1.85            | 3.320283 | 8.310033 |
| 1.7             | 1.410551 | 2.22262  | 1.9             | 3.216137 | 8.118358 |
| 1.8             | 1.356044 | 2.091053 | 1.95            | 3.102682 | 7.916845 |
| 1.9             | 1.310103 | 1.964218 | 2               | 2.99903  | 7.714899 |
| 2               | 1.272722 | 1.869494 | 2.1             | 2.818343 | 7.35445  |
| 2.2             | 1.211561 | 1.704404 | 2.2             | 2.665111 | 7.049581 |
| 2.4             | 1.165131 | 1.575867 | 2.3             | 2.528812 | 6.759186 |
| 2.6             | 1.129783 | 1.477432 | 2.4             | 2.395161 | 6.451998 |
| 2.8             | 1.100024 | 1.39339  | 2.5             | 2.283361 | 6.15847  |
| 3               | 1.075657 | 1.322761 | 2.6             | 2.182461 | 5.89607  |
|                 |          |          | 2.8             | 2.015995 | 5.409032 |

|  |  |  |     |          |          |
|--|--|--|-----|----------|----------|
|  |  |  | 3   | 1.870195 | 4.950444 |
|  |  |  | 3.2 | 1.750009 | 4.510368 |
|  |  |  | 3.5 | 1.606747 | 3.922324 |

2.3 Figure 4

| $F_a = 2$       |                                | $F_a = 10$      |                                |
|-----------------|--------------------------------|-----------------|--------------------------------|
| $\epsilon_{PS}$ | $\langle \cos\theta_F \rangle$ | $\epsilon_{PS}$ | $\langle \cos\theta_F \rangle$ |
| 0.05            | 0.009398                       | 0.05            | 0.067332                       |
| 0.1             | 0.011483                       | 0.1             | 0.068935                       |
| 0.15            | 0.01179                        | 0.15            | 0.073537                       |
| 0.2             | 0.015159                       | 0.2             | 0.077519                       |
| 0.3             | 0.015425                       | 0.3             | 0.080606                       |
| 0.4             | 0.020505                       | 0.4             | 0.087023                       |
| 0.5             | 0.021908                       | 0.5             | 0.088372                       |
| 0.6             | 0.026629                       | 0.6             | 0.095038                       |
| 0.65            | 0.030288                       | 0.7             | 0.100015                       |
| 0.7             | 0.035103                       | 0.8             | 0.106052                       |
| 0.75            | 0.036085                       | 0.9             | 0.113697                       |
| 0.8             | 0.046493                       | 1               | 0.123465                       |
| 0.85            | 0.049579                       | 1.1             | 0.129539                       |
| 0.9             | 0.057724                       | 1.2             | 0.138189                       |
| 0.95            | 0.062273                       | 1.25            | 0.143705                       |
| 1               | 0.067726                       | 1.3             | 0.146802                       |
| 1.05            | 0.075505                       | 1.35            | 0.155982                       |
| 1.1             | 0.082396                       | 1.4             | 0.157702                       |
| 1.15            | 0.089745                       | 1.45            | 0.164239                       |
| 1.2             | 0.097795                       | 1.5             | 0.166417                       |
| 1.25            | 0.102815                       | 1.55            | 0.172348                       |
| 1.3             | 0.106982                       | 1.6             | 0.176235                       |
| 1.35            | 0.108518                       | 1.65            | 0.183009                       |
| 1.4             | 0.113819                       | 1.7             | 0.187748                       |
| 1.45            | 0.118542                       | 1.75            | 0.193533                       |
| 1.5             | 0.120691                       | 1.8             | 0.196301                       |
| 1.6             | 0.125179                       | 1.85            | 0.20053                        |
| 1.7             | 0.12974                        | 1.9             | 0.20169                        |
| 1.8             | 0.131812                       | 1.95            | 0.206506                       |
| 1.9             | 0.1323                         | 2               | 0.211408                       |
| 2               | 0.133351                       | 2.1             | 0.216363                       |
| 2.2             | 0.13481                        | 2.2             | 0.225222                       |
| 2.4             | 0.131148                       | 2.3             | 0.229136                       |
| 2.6             | 0.128298                       | 2.4             | 0.234829                       |
| 2.8             | 0.121374                       | 2.5             | 0.239325                       |
| 3               | 0.115601                       | 2.6             | 0.243151                       |

|  |  |     |          |
|--|--|-----|----------|
|  |  | 2.8 | 0.250845 |
|  |  | 3   | 0.254032 |
|  |  | 3.2 | 0.256282 |
|  |  | 3.5 | 0.252127 |

## 2.4 Figure 5

mean adsorption probability  $P_{\text{ads}}$  for each monomer

| monomer index | $P_{\text{ads}}$ of $F_a = 2$ | $P_{\text{ads}}$ of $F_a = 10$ |
|---------------|-------------------------------|--------------------------------|
| 1             | 0.620013                      | 0.236281                       |
| 2             | 0.690563                      | 0.265563                       |
| 3             | 0.747063                      | 0.295163                       |
| 4             | 0.770638                      | 0.322706                       |
| 5             | 0.782138                      | 0.344525                       |
| 6             | 0.78435                       | 0.3637                         |
| 7             | 0.781025                      | 0.379238                       |
| 8             | 0.77795                       | 0.398756                       |
| 9             | 0.779475                      | 0.419288                       |
| 10            | 0.774738                      | 0.440963                       |
| 11            | 0.77785                       | 0.464088                       |
| 12            | 0.7749                        | 0.481656                       |
| 13            | 0.776                         | 0.498475                       |
| 14            | 0.773363                      | 0.510575                       |
| 15            | 0.773688                      | 0.5211                         |
| 16            | 0.775013                      | 0.533375                       |
| 17            | 0.773463                      | 0.54205                        |
| 18            | 0.772288                      | 0.54875                        |
| 19            | 0.772575                      | 0.55345                        |
| 20            | 0.772813                      | 0.560881                       |
| 21            | 0.772588                      | 0.572513                       |
| 22            | 0.770038                      | 0.577456                       |
| 23            | 0.774475                      | 0.582175                       |
| 24            | 0.773825                      | 0.579188                       |
| 25            | 0.773338                      | 0.577419                       |
| 26            | 0.7723                        | 0.579338                       |
| 27            | 0.770563                      | 0.580225                       |
| 28            | 0.772425                      | 0.582838                       |
| 29            | 0.768638                      | 0.581219                       |
| 30            | 0.770838                      | 0.577938                       |
| 31            | 0.7712                        | 0.573394                       |
| 32            | 0.772688                      | 0.572863                       |
| 33            | 0.7748                        | 0.575175                       |
| 34            | 0.772513                      | 0.58045                        |
| 35            | 0.770475                      | 0.5826                         |

|    |          |          |
|----|----------|----------|
| 36 | 0.76925  | 0.58295  |
| 37 | 0.771138 | 0.580688 |
| 38 | 0.770663 | 0.579775 |
| 39 | 0.772125 | 0.577113 |
| 40 | 0.773538 | 0.577419 |
| 41 | 0.774363 | 0.577819 |
| 42 | 0.770925 | 0.577063 |
| 43 | 0.769738 | 0.576238 |
| 44 | 0.770913 | 0.580313 |
| 45 | 0.767888 | 0.583419 |
| 46 | 0.771488 | 0.584581 |
| 47 | 0.771263 | 0.5877   |
| 48 | 0.769838 | 0.590769 |
| 49 | 0.767813 | 0.596606 |
| 50 | 0.768263 | 0.602788 |
| 51 | 0.772525 | 0.610419 |
| 52 | 0.7709   | 0.609938 |
| 53 | 0.770463 | 0.59805  |
| 54 | 0.7737   | 0.582406 |
| 55 | 0.774188 | 0.573075 |
| 56 | 0.7709   | 0.592006 |
| 57 | 0.770863 | 0.631856 |
| 58 | 0.7734   | 0.666969 |
| 59 | 0.771063 | 0.666256 |
| 60 | 0.76925  | 0.591225 |
| 61 | 0.771113 | 0.452519 |
| 62 | 0.769025 | 0.271563 |
| 63 | 0.769725 | 0.232956 |
| 64 | 0.793275 | 0.251831 |
| 65 | 1        | 1        |

2.5 Figure 6

| $F_a$ | $P_{\text{knot}}$ |
|-------|-------------------|
| 1     | 0                 |
| 2     | 0                 |
| 3     | 0                 |
| 4     | 0.05              |
| 5     | 0.1617            |
| 6     | 0.3728            |
| 7     | 0.6667            |
| 8     | 0.7138            |
| 9     | 0.7684            |
| 10    | 0.7174            |

|    |        |
|----|--------|
| 12 | 0.6676 |
| 15 | 0.4274 |
| 20 | 0.1064 |

2.6 Figure 7

| monomer index | $P_{\text{ads}}$ of unknotted polymer | $P_{\text{ads}}$ of knotted polymer |
|---------------|---------------------------------------|-------------------------------------|
| 1             | 0.21391                               | 0.24509                             |
| 2             | 0.24443                               | 0.27389                             |
| 3             | 0.27491                               | 0.30314                             |
| 4             | 0.30768                               | 0.32863                             |
| 5             | 0.33579                               | 0.34797                             |
| 6             | 0.36474                               | 0.36329                             |
| 7             | 0.38981                               | 0.37507                             |
| 8             | 0.41836                               | 0.39103                             |
| 9             | 0.4468                                | 0.40845                             |
| 10            | 0.47053                               | 0.42931                             |
| 11            | 0.50171                               | 0.44926                             |
| 12            | 0.52496                               | 0.4646                              |
| 13            | 0.55118                               | 0.47771                             |
| 14            | 0.57314                               | 0.48593                             |
| 15            | 0.5988                                | 0.49049                             |
| 16            | 0.61793                               | 0.50007                             |
| 17            | 0.6384                                | 0.50409                             |
| 18            | 0.65519                               | 0.50682                             |
| 19            | 0.67021                               | 0.50745                             |
| 20            | 0.68299                               | 0.51278                             |
| 21            | 0.70108                               | 0.52186                             |
| 22            | 0.7122                                | 0.52437                             |
| 23            | 0.7243                                | 0.52618                             |
| 24            | 0.73038                               | 0.51962                             |
| 25            | 0.74018                               | 0.5133                              |
| 26            | 0.75172                               | 0.51143                             |
| 27            | 0.75364                               | 0.51191                             |
| 28            | 0.76302                               | 0.51185                             |
| 29            | 0.76605                               | 0.5084                              |
| 30            | 0.77147                               | 0.50169                             |
| 31            | 0.77518                               | 0.4939                              |
| 32            | 0.776                                 | 0.49283                             |
| 33            | 0.78038                               | 0.49433                             |
| 34            | 0.7867                                | 0.49919                             |
| 35            | 0.78345                               | 0.50347                             |
| 36            | 0.78626                               | 0.50285                             |



|    |         |         |
|----|---------|---------|
| 37 | 0.78847 | 0.49883 |
| 38 | 0.79228 | 0.49606 |
| 39 | 0.79024 | 0.49315 |
| 40 | 0.79336 | 0.49235 |
| 41 | 0.79341 | 0.49289 |
| 42 | 0.79004 | 0.49316 |
| 43 | 0.79139 | 0.49148 |
| 44 | 0.79449 | 0.49594 |
| 45 | 0.79307 | 0.50082 |
| 46 | 0.7936  | 0.50223 |
| 47 | 0.79073 | 0.50771 |
| 48 | 0.79358 | 0.51087 |
| 49 | 0.79433 | 0.51871 |
| 50 | 0.7936  | 0.52761 |
| 51 | 0.79427 | 0.53799 |
| 52 | 0.7967  | 0.53636 |
| 53 | 0.7915  | 0.52184 |
| 54 | 0.79321 | 0.49936 |
| 55 | 0.79128 | 0.48711 |
| 56 | 0.79292 | 0.51285 |
| 57 | 0.79299 | 0.56838 |
| 58 | 0.79343 | 0.61715 |
| 59 | 0.78945 | 0.61772 |
| 60 | 0.7921  | 0.51209 |
| 61 | 0.78923 | 0.31987 |
| 62 | 0.78794 | 0.06813 |
| 63 | 0.79243 | 0.01255 |
| 64 | 0.80798 | 0.03273 |
| 65 | 1       | 1       |

2.7 Figure 8

| RRAP  |                   |           | FRAP  |                   |           |
|-------|-------------------|-----------|-------|-------------------|-----------|
| $F_a$ | $\epsilon_{PS}^*$ | Error bat | $F_a$ | $\epsilon_{PS}^*$ | Error bat |
| 0     | 1.05              | 0.05      | 0     | 1.05              | 0.05      |
| 1     | 1.05              | 0.05      | 2     | 1.05              | 0.05      |
| 2     | 1.1               | 0.05      | 5     | 1.1               | 0.05      |
| 3     | 1.1               | 0.05      | 10    | 1.1               | 0.05      |
| 4     | 1.15              | 0.05      | 15    | 1.15              | 0.1       |
| 5     | 1.2               | 0.05      | 17    | 1.2               | 0.1       |
| 6     | 1.25              | 0.05      | 20    | 1.25              | 0.1       |
| 7     | 1.25              | 0.05      |       |                   |           |
| 10    | 1.4               | 0.1       |       |                   |           |
| 12    | 1.5               | 0.1       |       |                   |           |

|    |      |     |  |  |  |
|----|------|-----|--|--|--|
| 15 | 1.95 | 0.1 |  |  |  |
| 20 | 2.4  | 0.1 |  |  |  |

2.8 Figure 9

| RRAP            |                                              |                 |                                              | FRAP            |                                              |                 |                                              |
|-----------------|----------------------------------------------|-----------------|----------------------------------------------|-----------------|----------------------------------------------|-----------------|----------------------------------------------|
| $\epsilon_{PS}$ | $\langle \cos\theta_F \rangle$ at $F_a = 10$ | $\epsilon_{PS}$ | $\langle \cos\theta_F \rangle$ at $F_a = 20$ | $\epsilon_{PS}$ | $\langle \cos\theta_F \rangle$ at $F_a = 10$ | $\epsilon_{PS}$ | $\langle \cos\theta_F \rangle$ at $F_a = 20$ |
| 0.1             | 0.06894                                      | 0.1             | 0.20248                                      | 0.1             | -3.31024E-4                                  | 0.1             | -9.66758E-4                                  |
| 0.15            | 0.07354                                      | 0.2             | 0.20232                                      | 0.15            | -7.86045E-4                                  | 0.2             | 7.36562E-4                                   |
| 0.2             | 0.07752                                      | 0.3             | 0.20607                                      | 0.2             | 0.00289                                      | 0.4             | -0.00343                                     |
| 0.3             | 0.08061                                      | 0.4             | 0.20874                                      | 0.3             | -6.36557E-4                                  | 0.6             | -1.40996E-4                                  |
| 0.4             | 0.08702                                      | 0.5             | 0.20875                                      | 0.4             | -0.00221                                     | 0.8             | 0.00111                                      |
| 0.5             | 0.08837                                      | 0.6             | 0.21035                                      | 0.5             | -8.47294E-4                                  | 1               | 5.4115E-5                                    |
| 0.6             | 0.09504                                      | 0.7             | 0.21329                                      | 0.6             | 0.00193                                      | 1.1             | -0.00266                                     |
| 0.7             | 0.10002                                      | 0.8             | 0.21445                                      | 0.65            | -0.0011                                      | 1.2             | -0.00262                                     |
| 0.8             | 0.10605                                      | 0.9             | 0.21624                                      | 0.7             | -0.00325                                     | 1.3             | -0.00535                                     |
| 0.9             | 0.1137                                       | 1               | 0.21844                                      | 0.75            | 0.00125                                      | 1.35            | 0.00281                                      |
| 1               | 0.12347                                      | 1.1             | 0.22279                                      | 0.8             | 3.77149E-4                                   | 1.4             | -0.00189                                     |
| 1.1             | 0.12954                                      | 1.2             | 0.22499                                      | 0.85            | -0.00103                                     | 1.45            | 9.20689E-4                                   |
| 1.2             | 0.13819                                      | 1.3             | 0.22768                                      | 0.9             | 0.00106                                      | 1.5             | -0.00216                                     |
| 1.25            | 0.14371                                      | 1.4             | 0.23046                                      | 0.95            | -0.00211                                     | 1.55            | -0.0048                                      |
| 1.3             | 0.1468                                       | 1.5             | 0.235                                        | 1               | 0.00271                                      | 1.6             | -4.34623E-4                                  |
| 1.35            | 0.15598                                      | 1.6             | 0.237                                        | 1.05            | 0.00387                                      | 1.65            | -0.00203                                     |
| 1.4             | 0.1577                                       | 1.7             | 0.24297                                      | 1.1             | -7.18952E-4                                  | 1.7             | 0.00505                                      |
| 1.45            | 0.16424                                      | 1.8             | 0.24784                                      | 1.15            | 0.00173                                      | 1.75            | 0.00456                                      |
| 1.5             | 0.16642                                      | 1.9             | 0.24978                                      | 1.2             | 3.88977E-4                                   | 1.85            | 0.00468                                      |
| 1.55            | 0.17235                                      | 1.95            | 0.25291                                      | 1.25            | -0.00183                                     | 2               | 0.00368                                      |
| 1.6             | 0.17624                                      | 2               | 0.2556                                       | 1.3             | 0.0017                                       | 2.25            | 0.00505                                      |
| 1.65            | 0.18301                                      | 2.05            | 0.25651                                      | 1.35            | 2.18291E-4                                   | 2.5             | 0.00472                                      |
| 1.7             | 0.18775                                      | 2.1             | 0.2581                                       | 1.4             | 0.00213                                      | 2.75            | 0.00683                                      |
| 1.75            | 0.19353                                      | 2.15            | 0.25969                                      | 1.45            | 0.00206                                      | 3               | 0.00585                                      |
| 1.8             | 0.1963                                       | 2.2             | 0.26028                                      | 1.5             | 7.9442E-5                                    |                 |                                              |
| 1.85            | 0.20053                                      | 2.25            | 0.26438                                      | 1.6             | 3.29919E-4                                   |                 |                                              |
| 1.9             | 0.20169                                      | 2.3             | 0.26383                                      | 1.7             | 0.00285                                      |                 |                                              |
| 1.95            | 0.20651                                      | 2.4             | 0.2692                                       | 1.8             | -0.00123                                     |                 |                                              |
| 2               | 0.21141                                      | 2.5             | 0.27434                                      | 1.9             | 5.34838E-4                                   |                 |                                              |
| 2.1             | 0.21636                                      | 2.6             | 0.27601                                      | 2               | -7.17618E-4                                  |                 |                                              |
| 2.2             | 0.22522                                      | 2.7             | 0.2791                                       | 2.2             | -5.72747E-4                                  |                 |                                              |
| 2.3             | 0.22914                                      | 2.8             | 0.28507                                      | 2.4             | -0.00144                                     |                 |                                              |
| 2.4             | 0.23483                                      | 3               | 0.29108                                      | 2.6             | -2.61303E-4                                  |                 |                                              |
| 2.5             | 0.23933                                      |                 |                                              | 2.8             | 5.8223E-4                                    |                 |                                              |
| 2.6             | 0.24315                                      |                 |                                              | 3               | 7.07502E-4                                   |                 |                                              |
| 2.8             | 0.25084                                      |                 |                                              |                 |                                              |                 |                                              |

|   |         |  |  |  |  |  |
|---|---------|--|--|--|--|--|
| 3 | 0.25403 |  |  |  |  |  |
|---|---------|--|--|--|--|--|

2.9 Figure 10

| $N$ | RRAP              |           | FRAP              |           |
|-----|-------------------|-----------|-------------------|-----------|
|     | $\epsilon_{PS}^*$ | Error bar | $\epsilon_{PS}^*$ | Error bar |
| 9   | 2                 | 0.05      | 1.3               | 0.05      |
| 17  | 1.7               | 0.05      | 1.25              | 0.05      |
| 33  | 1.4               | 0.05      | 1.15              | 0.05      |
| 65  | 1.2               | 0.05      | 1.1               | 0.05      |
